# Supplementary material for: Physicochemical and Functional Changes in Lotus Root Polysaccharide Associated with Noncovalent Binding of Polyphenols
Source: MDPI journal article supplement (doi:10.3390/foods12051049), 2023-03-01
Supplement: s1 [file s1]

## Supplementary information

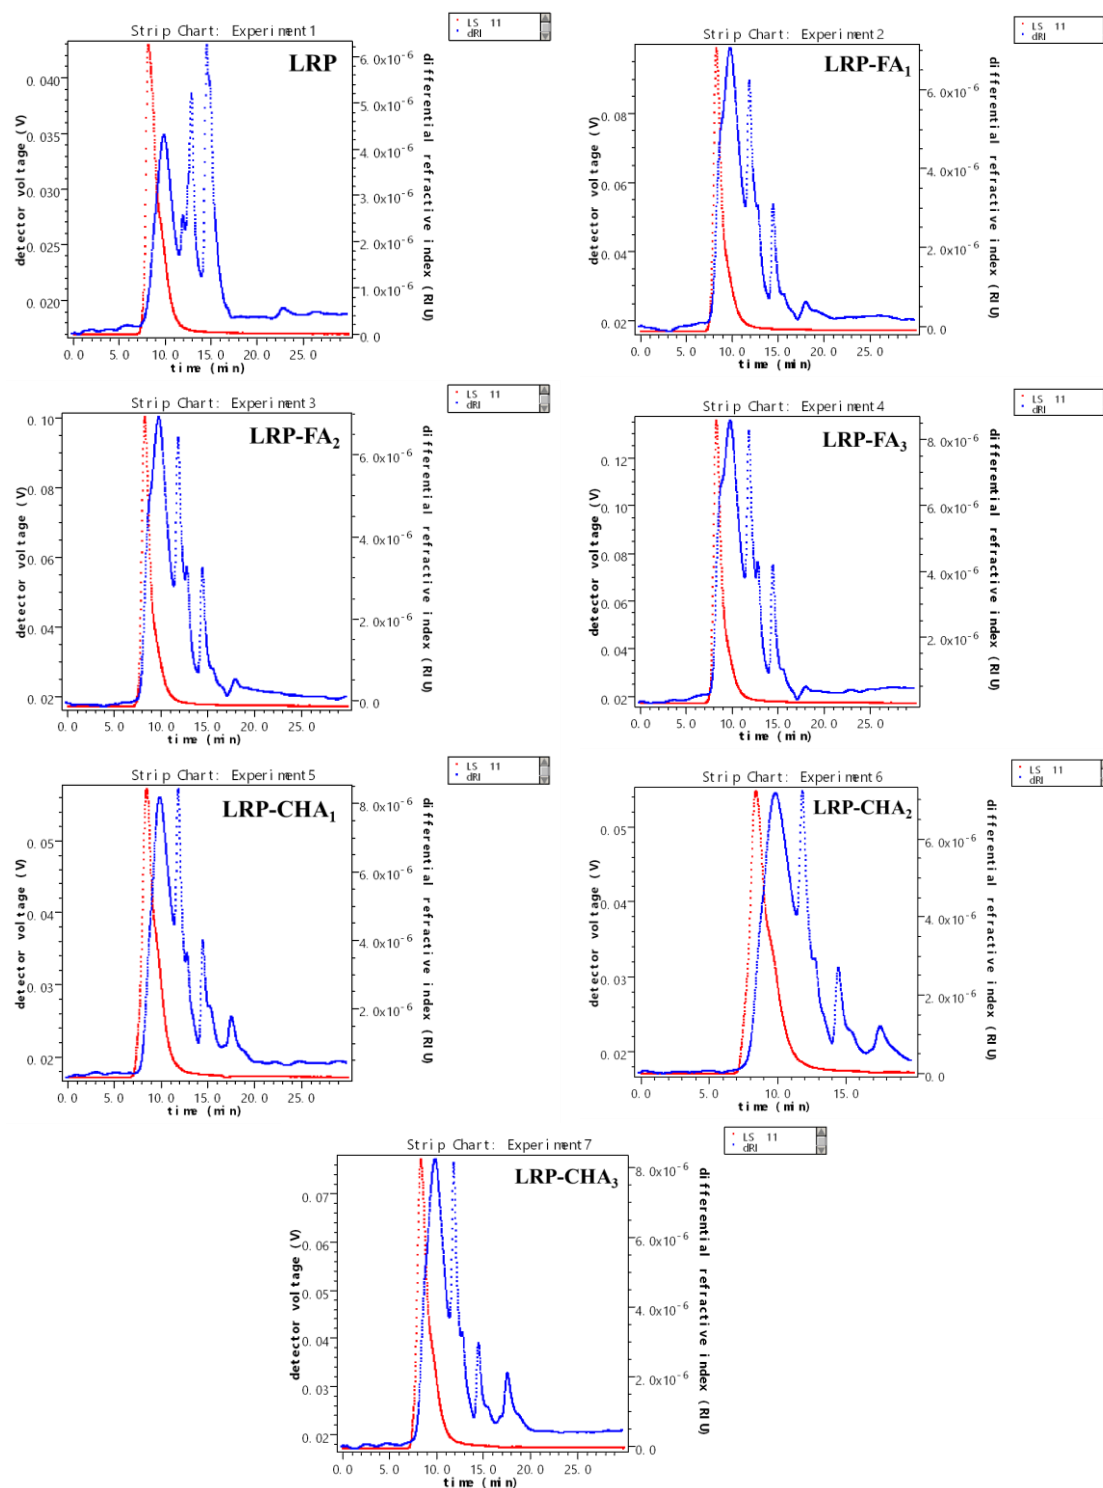

Figure S1. HPSEC-MALLS-RI chromatogram of LRP, and polyphenol complex
